# Supplementary material for: New Complexes of Actinides with Monobromoacetate Ions: Synthesis and Structures
Source: PubMed Central journal article supplement — ACS Omega. 2021 Aug 10;6(33):21485–90. doi: 10.1021/acsomega.1c02296 (PMC8388085; doi:10.1021/acsomega.1c02296), 2021-08-10
Supplement: ao1c02296_si_001.pdf [file ao1c02296_si_001.pdf]

## SUPPORTING INFORMATION

### **New Complexes of Actinides with Monobromoacetate Ions: Synthesis and Structures**

Andrei S. Uhanov<sup>a</sup>, Marina N. Sokolova<sup>b</sup>, Aleksandr M. Fedoseev<sup>b</sup>, Alexei A. Bessonov<sup>b</sup>,  
Olga N. Nechaeva<sup>a</sup>, Anton V. Savchenkov<sup>a\*</sup>, Denis V. Pushkin<sup>a</sup>

<sup>a</sup> *Samara National Research University, 34, Moskovskoye shosse, Samara 443086, Russia*

<sup>b</sup> *Frumkin Institute of Physical Chemistry and Electrochemistry, Russian Academy of Sciences,  
31, bld. 4 Leninsky prospect, Moscow 119071, Russia*

**Table S1.** Geometric parameters of coordination polyhedra of actinide atoms  
in crystal structures of **I–IV**

| Bond                                                                                                                                                                                                        | $d$ , Å  | $\Omega$ , %* | Angle    | $\omega$ , deg. |
|-------------------------------------------------------------------------------------------------------------------------------------------------------------------------------------------------------------|----------|---------------|----------|-----------------|
| (CH <sub>3</sub> ) <sub>4</sub> N[UO <sub>2</sub> (CH <sub>2</sub> BrCOO) <sub>3</sub> ] ( <b>I</b> )<br>Hexagonal bipyramid UO <sub>8</sub> , V <sub>VDP</sub> = 9.33 Å <sup>3**</sup>                     |          |               |          |                 |
| U–O1                                                                                                                                                                                                        | 1.761(4) | 21.64         | O1–U–O2  | 179.3(2)        |
| U–O2                                                                                                                                                                                                        | 1.768(4) | 22.01         | O6–U–O7  | 67.59(14)       |
| U–O6                                                                                                                                                                                                        | 2.455(4) | 9.53          | O8–U–O7  | 52.60(14)       |
| U–O4                                                                                                                                                                                                        | 2.457(4) | 9.46          | O4–U–O3  | 52.64(12)       |
| U–O8                                                                                                                                                                                                        | 2.459(4) | 9.48          | O8–U–O3  | 67.62(13)       |
| U–O7                                                                                                                                                                                                        | 2.460(4) | 9.45          | O6–U–O5  | 62.40(13)       |
| U–O3                                                                                                                                                                                                        | 2.475(4) | 9.26          | O4–U–O5  | 67.16(12)       |
| U–O5                                                                                                                                                                                                        | 2.476(4) | 9.17          |          |                 |
| (CH <sub>3</sub> ) <sub>4</sub> N[NpO <sub>2</sub> (CH <sub>2</sub> BrCOO) <sub>2</sub> (NO <sub>3</sub> )] ( <b>II</b> )<br>Hexagonal bipyramid NpO <sub>8</sub> , V <sub>VDP</sub> = 9.20 Å <sup>3</sup>  |          |               |          |                 |
| Np–O2                                                                                                                                                                                                       | 1.740(3) | 22.25         | O2–Np–O1 | 178.73(15)      |
| Np–O1                                                                                                                                                                                                       | 1.743(3) | 21.90         | O5–Np–O4 | 69.11(10)       |
| Np–O5                                                                                                                                                                                                       | 2.423(3) | 9.86          | O3–Np–O4 | 52.78(9)        |
| Np–O3                                                                                                                                                                                                       | 2.445(3) | 9.32          | O5–Np–O6 | 53.31(9)        |
| Np–O4                                                                                                                                                                                                       | 2.448(3) | 9.46          | O3–Np–O8 | 65.87(9)        |
| Np–O6                                                                                                                                                                                                       | 2.454(3) | 9.54          | O6–Np–O7 | 68.27(11)       |
| Np–O8                                                                                                                                                                                                       | 2.492(3) | 8.85          | O8–Np–O7 | 50.75(10)       |
| Np–O7                                                                                                                                                                                                       | 2.515(3) | 8.82          |          |                 |
| (CH <sub>3</sub> ) <sub>4</sub> N[PuO <sub>2</sub> (CH <sub>2</sub> BrCOO) <sub>2</sub> (NO <sub>3</sub> )] ( <b>III</b> )<br>Hexagonal bipyramid PuO <sub>8</sub> , V <sub>VDP</sub> = 8.96 Å <sup>3</sup> |          |               |          |                 |
| Pu–O2                                                                                                                                                                                                       | 1.690(6) | 22.47         | O2–Pu–O1 | 179.9(3)        |
| Pu–O1                                                                                                                                                                                                       | 1.727(6) | 22.26         | O4–Pu–O3 | 53.03(19)       |
| Pu–O4                                                                                                                                                                                                       | 2.424(6) | 9.65          | O5–Pu–O6 | 52.9(2)         |
| Pu–O3                                                                                                                                                                                                       | 2.432(5) | 9.24          | O6–Pu–O7 | 67.9(2)         |
| Pu–O5                                                                                                                                                                                                       | 2.445(6) | 9.43          | O3–Pu–O8 | 65.1(2)         |
| Pu–O6                                                                                                                                                                                                       | 2.449(5) | 9.33          | O7–Pu–O8 | 50.4(2)         |
| Pu–O7                                                                                                                                                                                                       | 2.477(6) | 9.00          | O4–Pu–O5 | 70.9(2)         |
| Pu–O8                                                                                                                                                                                                       | 2.488(6) | 8.62          |          |                 |
| (CH <sub>3</sub> ) <sub>4</sub> N[NpO <sub>2</sub> (CH <sub>2</sub> BrCOO)(NO <sub>3</sub> ) <sub>2</sub> ] ( <b>IV</b> )<br>Hexagonal bipyramid NpO <sub>8</sub> , V <sub>VDP</sub> = 9.21 Å <sup>3</sup>  |          |               |          |                 |
| Np–O1                                                                                                                                                                                                       | 1.744(3) | 21.87         | O1–Np–O2 | 178.39(15)      |
| Np–O2                                                                                                                                                                                                       | 1.749(3) | 22.11         | O4–Np–O3 | 53.44(11)       |
| Np–O4                                                                                                                                                                                                       | 2.413(3) | 9.68          | O3–Np–O9 | 68.75(12)       |
| Np–O3                                                                                                                                                                                                       | 2.435(3) | 9.44          | O4–Np–O5 | 67.50(11)       |
| Np–O9                                                                                                                                                                                                       | 2.471(4) | 9.25          | O5–Np–O6 | 51.51(12)       |
| Np–O5                                                                                                                                                                                                       | 2.475(4) | 9.13          | O9–Np–O8 | 51.91(14)       |
| Np–O6                                                                                                                                                                                                       | 2.478(3) | 9.28          | O6–Np–O8 | 66.89(13)       |
| Np–O8                                                                                                                                                                                                       | 2.482(3) | 9.23          |          |                 |

\*  $\Omega$  is the solid angle (in percent of  $4\pi$  steradian), at which the shared face of the Voronoi–Dirichlet polyhedra of adjacent atoms is seen from the nucleus of any of them.

\*\* V<sub>VDP</sub> is the volume of Voronoi–Dirichlet polyhedron of the actinide atom, Å<sup>3</sup>.
